# Supplementary material
Source: PubMed Central journal article supplement (PMC3612625)
Supplement: 1218311110_pnas.201218311SI.pdf [file 1218311110_pnas.201218311SI.pdf]

for clinical and genetic research and their data and samples were stored in the LIMS database using unique identifiers to protect the participants' privacy.

#### Antibodies.

TDP-43 (Sigma SAB420006), WB 1:10,000  
TDP-43 (Novus Biologicals NB110-55376), WB 1:2,000  
TDP-43 (Cosmo Bio CAC-TIP-TD-P09), WB 1:8,000  
Vinculin (Sigma-Aldrich V4505), IF 1:50  
 $\alpha$ -Actinin (Sigma-Aldrich A7811), IF 1:500  
znp-1 (DSHB), IF 1:100  
acetylated Tubulin (Sigma T6793), IF 1:100  
ZE-BO-1F4, (rat IgG2a), IF 1:1 (7)  
 $\alpha$ -Tubulin (Sigma T6199), WB 1:8,000  
Anti-mouse IgG, HRP conj. (Promega, W4021), WB 1:5,000  
Anti-rabbit IgG, HRP conj. (Promega, W4011), WB 1:10,000  
Alexa Fluor antibodies (Invitrogen), IF 1:500

The following antibodies were generated by the Institute of Molecular Immunology, Helmholtz Center Munich by standard procedures:

Tardbpl 8G1 (Tardbpl epitope: KYFLEQAGPD), WB 1:1, rat IgG2c  
Tardbpl\_tv1 16C8-11 (Tardbpl\_tv1 epitope: SRQMMDRG-RFGGYG), WB 1:10, rat IgG2a  
Tardbpl 5F5-11 (Tardbpl epitope: FERSQYQFPSSHV), WB 1:1, rat IgG2a  
Tardbp 4A12-111 (Tardbp epitope: TSTSGTSSSRDQAQTY), WB 1:1, rat IgG2a  
Anti-rat IgG2c, HRP conj., WB 1:16,000  
Anti-rat IgG2a, HRP conj., WB 1:12,000

**Western Blotting.** Embryos were frozen in liquid nitrogen and lysed in 4 $\times$  Lämmli buffer by sonication. Lysates were boiled for 5 min at 95 °C while shaking at 800 rpm. Supernatant was loaded after a 5-min spin at 13,000 rpm at room temperature. A total of 0.5–1.0 embryos per lane and about one-tenth of an adult brain per lane were loaded on 12% (wt/vol) Tris glycine gels. After electrophoresis, probes were transferred to PVDF membranes (Millipore). Membranes were blocked for 1 h in TBST with 3% fat free milk powder. The primary antibody was incubated in block solution overnight at 4 °C. After washing 4  $\times$  15 min with TBST with 3% fat-free milk powder, the secondary antibody was incubated for 1 h in TBST with 3% (wt/vol) fat-free milk powder. Development of the membrane after 6  $\times$  15 min TBST washes was performed with ECLplus (Amersham).

**Microangiography.** Microangiography was performed as previously described (8).

**Electron Microscopy.** Zebrafish embryos at 2 dpf were cut in half crosswise and the posterior half was high-pressure frozen immediately in a Bal-Tec HPM 010. Freeze substitution was carried out in a Leica AFS2 at –90 °C for 100 h in 0.1% (vol/vol) tannic acid, 7 h in 2% (vol/vol) OsO<sub>4</sub>, and at –20 °C for 16 h in 2% OsO<sub>4</sub>, followed by embedding in EPON at room temperature. Next, 50-nm cross-sections were poststained with saturated uranyl acetate in 75% methanol and 4% (wt/vol) lead citrate (9). Micrographs were taken with a 1,024  $\times$  1,024 CCD detector (Proscan CCD HSS 512/1024; Proscan Electronic Systems) in a Zeiss electron microscope 902A, operated in the bright-field mode.

**Proteomics.** Sample preparation for mass spectrometry was performed as previously described (10). In brief, pools of 16 1.5-dpf-old devalued embryos were lysed in 300  $\mu$ L lysis buffer [4% (wt/vol) SDS, 100 mM Tris pH 7.6, 100 mM DTT] at 95 °C and

consecutively sonicated for 30 s (Cell Disruptor B15; Branson). Samples were centrifuged at 10,000  $\times$  *g* to remove insoluble cellular debris. Upon addition of an equal volume of 8 M urea, one-third of the cell lysate was added to a 30-kDa vivacon spin column (Sartorius Stedim). Filter-aided sample preparation was performed as previously described (11). To allow quantitative comparison between the samples obtained from wild-type and *tardbp*<sup>-/-</sup>; *tardbpl*<sup>-/-</sup> double-knockout fish, dimethyl-labeling was applied as previously described (12). Peptides resulting from the tryptic digest of the wild-type fish were labeled “light” using undeuterated formaldehyde (Fluka), and peptides from the double-knockout fish were labeled “heavy” using deuterated formaldehyde (Aldrich). Labeled peptides from both conditions were mixed in a 1:1 ratio and dried in a speed-vacuum centrifuge. To reduce the complexity of peptide mixture, stage tip-based anion exchange chromatography was applied (13). Five fractions were obtained using elution buffers with a pH of 11, 8, 6, 5, and 3. Every fraction was analyzed twice in a LC-MS/MS set-up consisting of an Easy nLC II (Proxeon) and an LTQ-Velos Orbitrap mass spectrometer (ThermoFisher Scientific). Samples were separated on 15-cm capillary emitter columns (New Objective; FS360-75-8-N-S-C15) packed in-house with 2.4- $\mu$ m C18 material (ReproSil-Pur 120 C18-AQ; Dr. Maisch GmbH) applying 200-min gradients ranging from 7–42% (vol/vol) acetonitrile. The gradient consisted of two linear sections (7–25% acetonitrile in the first 167 min and 25–42% acetonitrile in the following 36 min). Full FTMS scans were obtained at a resolution of 60,000 with 1,000,000 as FTMS full AGC target and recorded in profile mode. Up to the 14 most-intense ions from each full FTMS scan were isolated and fragmented by collision-induced dissociation fragmentation with an isolation width of 2 Da and enabled wideband activation. Selection of the top 14 precursor ions was restricted by a dynamic exclusion list (50-s exclusion time, 500 ion list size) and charge-state screening with enabled monoisotopic precursor selection. MS2 spectra were recorded in centroid mode in the linear ion trap with 10,000 as ion trap AGC target value. Data analyses were performed using the freely available MaxQuant software suite (v1.2.0.11) with the embedded Andromeda search algorithm for protein identification (14, 15). Most default settings of the software suite including a false-discovery rate of less than 1% at peptide and protein level were applied (exceptions: modifications were set according to the dimethyl-labeling protocol, three missed cleavages were allowed and a second peptide search was performed). Database search was performed using the *Danio rerio* IPI database (v3.86). As filter criteria for the final dataset, at least two unique peptides per protein group were required as well as a possible quantification of the respective protein group in at least two of the three biological replicates. From the two technical replicates of each biological replicate, the mean ratio was calculated on the basis of the normalized heavy/light (H/L) isotope ratios (equates the ratio of protein level of the respective protein group between the double knock out and the wild-type fish). For final quantification of the protein levels, the mean from the three biological replicates was determined as well as the SEM as a measurement for the variability between the replicates. A *P* value was calculated for every protein on the basis of a Student *t* test. The abundance ratios from the different biological replicates of the respective protein were compared with the mean abundance ratios of the reference proteins in the different biological replicates. A *P* value below 0.05, an increase or decrease of protein abundance by at least 30% and the quantification of the respective protein in at least two biological replicates were defined as the inclusion criteria for the final hit list. For better graphic display of single peptide spectra, raw data were also analyzed using the Proteome Discoverer Suite 1.2 (ThermoFisher Scientific) with the embedded SEQUEST algorithm for protein identification as described previously (16).





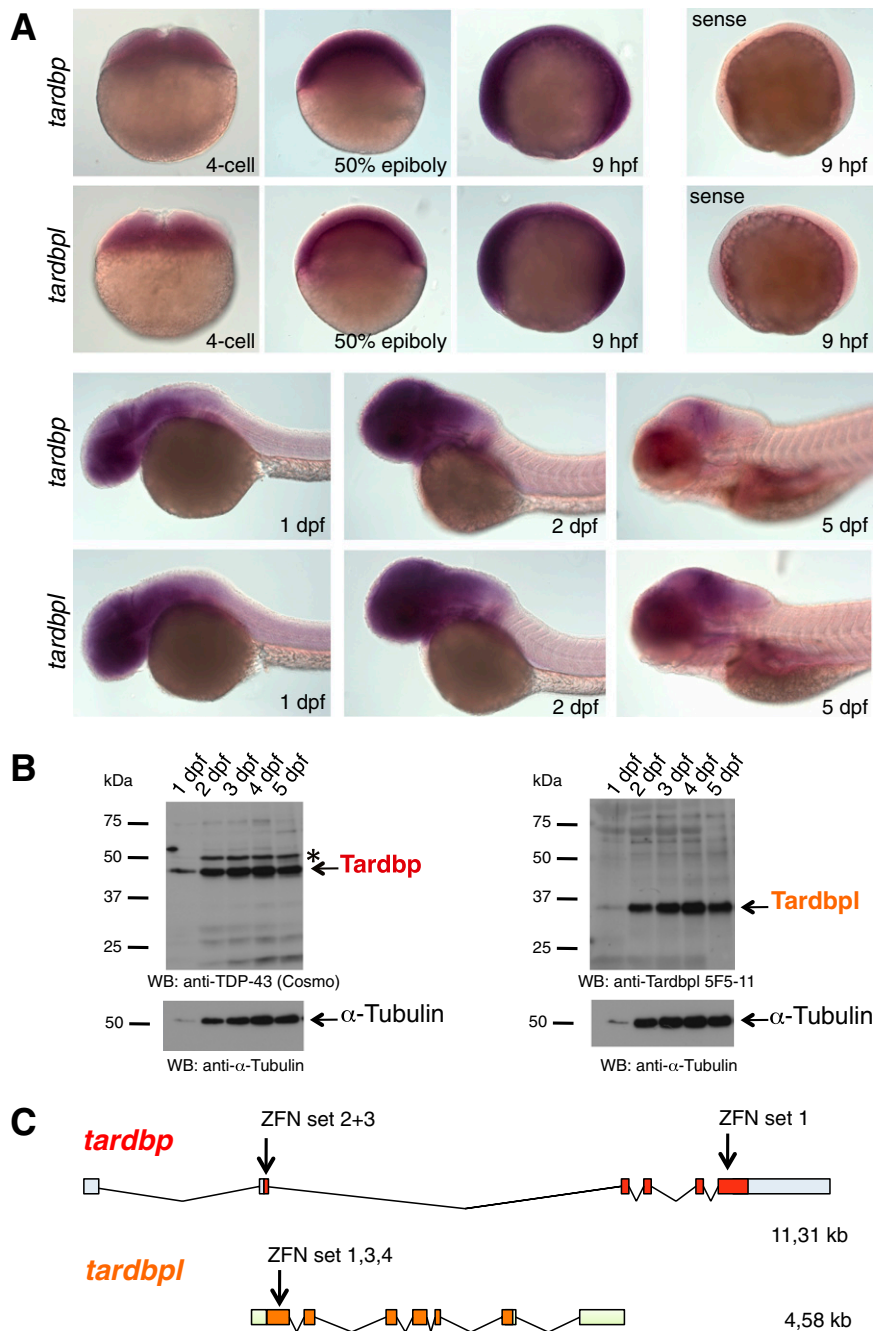

**Fig. S1.** *Tardbp* and *Tardbpl* are expressed throughout development and overview of zinc finger binding sites of the ZFN. (A) In situ hybridization with antisense probes specific for *tardbp* and *tardbpl* during early developmental stages of 4 cell to 5-dpf-old wild-type embryos. Labeling of 9-hpf-old embryos with a sense probe serves as a negative control (magnification: 10 $\times$ ). (B, Left) Western blot analysis with the *Tardbp*-specific antibody anti-TDP-43 (Cosmo) reveals expression of *Tardbp* protein 1 dpf through 5 dpf. The asterisk marks an unspecific band. (Right) Western blot analysis with a *Tardbpl*-specific antibody (anti-*Tardbpl* 5F5-11) shows that *Tardbpl* is expressed 1 dpf through 5 dpf. Analysis with an anti- $\alpha$ -Tubulin specific antibody of the respective blots serves as a loading control. (C) Schematic representation of the genomic organization of the ZFN (*tardbp* (light blue boxes represent 5' and 3' UTR; red boxes represent coding exons) and *tardbpl* (light green boxes represent 5' and 3' UTR; orange boxes represent coding exons) locus. Arrows indicate genomic localization of the target sequence of respective ZFN sets.



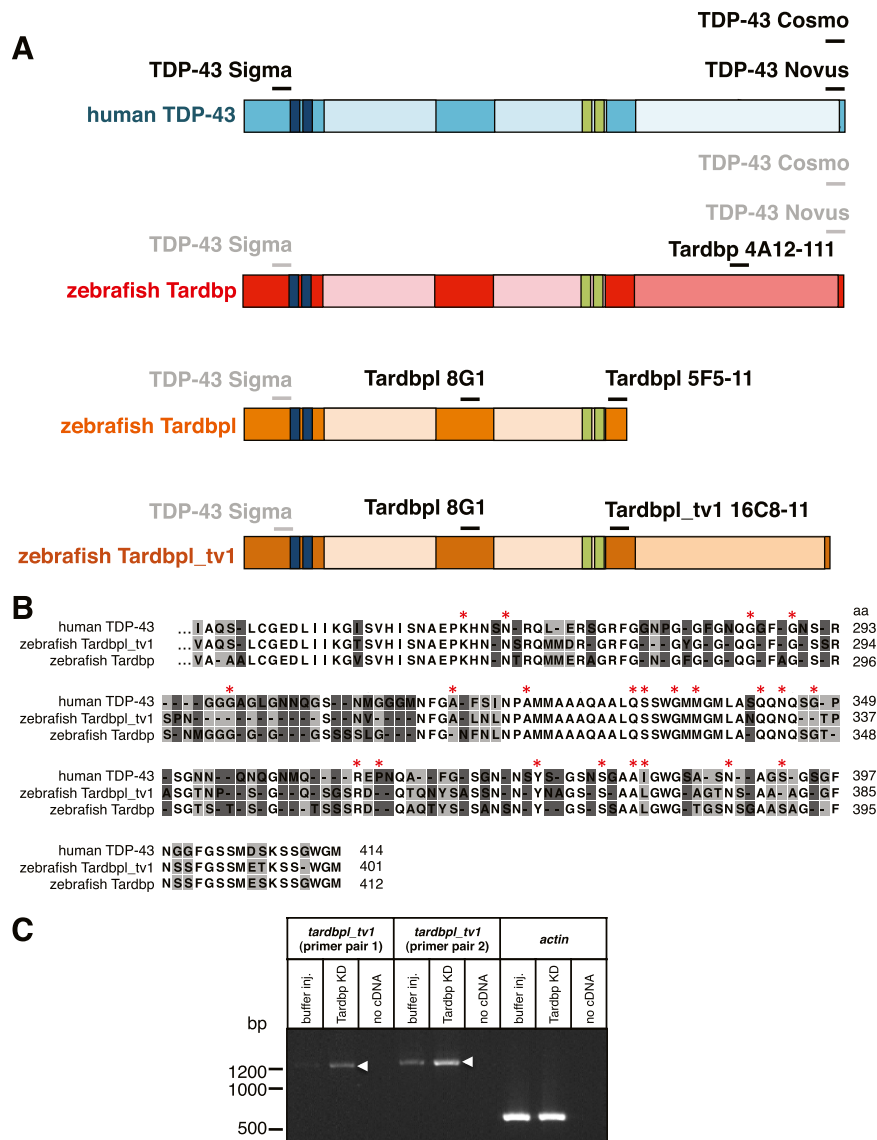

**Fig. 53.** Schematic representation of antibody binding sites, alignment of C termini of human TDP-43, Tardbpl\_tv1, and Tardbp, and up-regulation of *tardbpl\_tv1* mRNA upon loss of Tardbp. (A) Epitopes of respective antibodies (written in black) are indicated as a black line above the schematically represented proteins (protein domains as in Fig. 1). Lines and antibody names in gray indicate cross-reactivity of antibodies raised against human TDP-43 protein with the corresponding epitopes of zebrafish homologs. (B) Amino acid alignment of exon 5 of Tardbpl\_tv1 with the corresponding sequence of zebrafish Tardbp and human TDP-43 (identical amino acids are not highlighted, identical amino acids in two of the three amino acids are highlighted in light gray and nonidentical amino acids are highlighted in dark gray). Amino acids mutated in ALS/FTLD patients are marked with a red asterisk. (C) Semiquantitative RT-PCR with primers specific for *tardbpl\_tv1* (*tardbpl\_tv1* primer pair 1 and 2) and *actin* as a loading control. Each primer pair is used on cDNA generated from buffer injected control embryos, Tardbp knockdown embryos, or a negative control with no cDNA added, respectively. Arrowheads indicate the up-regulation of *tardbpl\_tv1* transcript upon Tardbp KD compared with buffer injected control embryos.









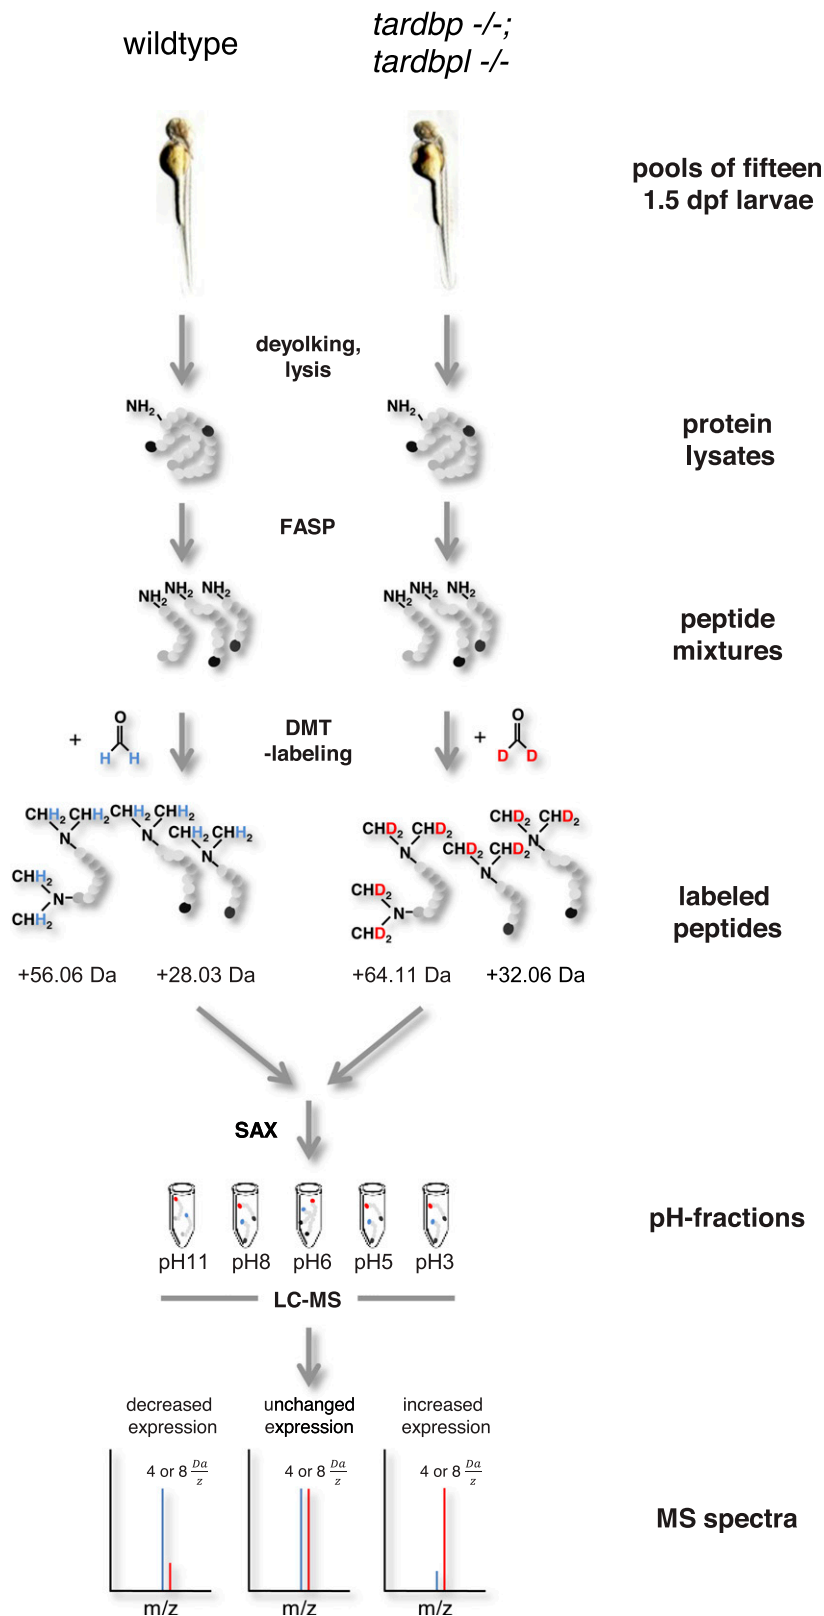

**Fig. S7.** Schematic view of the quantitative proteomic analysis. Pools of 16 1.5-dpf embryos were devalked and lysed consecutively. Protein lysates were tryptically digested using the filter-assisted sample preparation technique (FASP). Tryptic peptides ending either on arginine (depicted in black) or a lysine (depicted in dark gray) were labeled using differential stable isotope dimethyl labeling (DMT-labeling). Peptides gained from wild-type embryos were labeled "light" using undeuterated formaldehyde, whereas peptides gained from *tardbp*<sup>-/-</sup>;*tardbpl*<sup>-/-</sup> mutant embryos were labeled "heavy" using deuterated formaldehyde. Dimethylation occurs at free amine-groups resulting in the addition of four methyl-groups to lysine-containing tryptic peptides whereas only two methyl-groups are added to arginine-containing tryptic peptides; this results in a shift of +56.06 Da or +28.03 Da, respectively, for the light-labeled peptides. Legend continued on following page







**Table S3. Quantitative mass spectrometry analysis of *tardbp*<sup>-/-</sup>; *tardbp1*<sup>-/-</sup> mutants (down-regulated proteins)**

| Protein names                                              | Gene names                | Accession   | Peptides | Unique peptides | PEP       | Ratio Ex. 1 | Ratio Ex. 2 | Ratio Ex. 3 | Mean Ratio | SEM  | P value |
|------------------------------------------------------------|---------------------------|-------------|----------|-----------------|-----------|-------------|-------------|-------------|------------|------|---------|
| Parvalbumin 1                                              | <i>pvalb1</i>             | IPI00494456 | 6        | 3               | 1.88E-127 | 0.62        | 0.76        | 0.71        | 0.70       | 0.04 | 0.0108  |
| Myomesin 1a                                                | <i>myom1a</i>             | IPI00493389 | 26       | 25              | 8.37E-143 | 0.68        | 0.78        | 0.61        | 0.69       | 0.05 | 0.0201  |
| Dystrophin                                                 | <i>dmd</i>                | IPI00510896 | 10       | 9               | 3.85E-28  | 0.80        | 0.57        | 0.58        | 0.69       | 0.08 | 0.0355  |
| Apolipoprotein A1                                          | <i>apoa1</i>              | IPI00495830 | 21       | 20              | 8.99E-228 | 0.83        | 0.59        | 0.64        | 0.69       | 0.07 | 0.0409  |
| Cytosolic 5-nucleotidase 3                                 | <i>nt5c3</i>              | IPI01024291 | 4        | 4               | 6.50E-29  | NQ          | 0.68        | 0.68        | 0.68       | 0.00 | 0.0003  |
| Ryanodine receptor 1b                                      | <i>ryr1b</i>              | IPI00771673 | 22       | 21              | 1.42E-124 | 0.67        | 0.78        | 0.53        | 0.66       | 0.07 | 0.0350  |
| Slow myosin heavy chain 1                                  | <i>smyhc1</i>             | IPI00934366 | 116      | 6               | 0         | 0.68        | 0.72        | 0.54        | 0.65       | 0.05 | 0.0182  |
| Atrial myosin light chain                                  | <i>zgc:66286</i>          | IPI00509545 | 10       | 7               | 5.58E-132 | 0.60        | 0.77        | 0.56        | 0.64       | 0.06 | 0.0248  |
| Parvalbumin 4                                              | <i>pvalb4</i>             | IPI00507878 | 5        | 3               | 1.39E-15  | 0.75        | 0.69        | 0.49        | 0.64       | 0.08 | 0.0373  |
| Fast muscle troponin T isoform TnnT3b                      | <i>tntt3b</i>             | IPI00817433 | 10       | 8               | 4.42E-180 | 0.76        | 0.57        | 0.58        | 0.64       | 0.06 | 0.0207  |
| Type IV antifreeze protein                                 | <i>zgc:161979</i>         | IPI00637112 | 6        | 5               | 6.81E-19  | 0.78        | 0.50        | 0.62        | 0.63       | 0.08 | 0.0366  |
| Cardiac muscle myosin heavy chain 6 alpha                  | <i>myh6</i>               | IPI00490216 | 45       | 2               | 0         | 0.57        | 0.79        | 0.47        | 0.61       | 0.09 | 0.0452  |
| Fast skeletal muscle myosin light polypeptide 3            | <i>mylz3</i>              | IPI00488248 | 13       | 9               | 3.77E-135 | 0.58        | 0.75        | 0.51        | 0.61       | 0.07 | 0.0261  |
| Myosin binding protein H                                   | <i>LOC570313</i>          | IPI00502301 | 14       | 14              | 1.67E-183 | 0.60        | 0.68        | 0.53        | 0.60       | 0.04 | 0.0083  |
| Myosin binding protein C, fast type b                      | <i>mybpc2b</i>            | IPI00484548 | 24       | 24              | 5.00E-230 | 0.61        | 0.68        | 0.51        | 0.60       | 0.05 | 0.0121  |
| Desmoplakin                                                | <i>dsp</i>                | IPI00802893 | 8        | 8               | 7.02E-68  | 0.61        | 0.48        | 0.70        | 0.60       | 0.06 | 0.0187  |
| Myomesin 3                                                 | <i>myom3</i>              | IPI00900800 | 24       | 21              | 7.08E-151 | 0.56        | 0.67        | 0.55        | 0.60       | 0.04 | 0.0054  |
| Calsequestrin                                              | <i>casq2</i>              | IPI00492700 | 6        | 6               | 1.76E-40  | 0.62        | 0.64        | 0.50        | 0.59       | 0.04 | 0.0080  |
| Myosin light chain, phosphorylatable, fast skeletal muscle | <i>mylpflb</i>            | IPI00496651 | 15       | 6               | 0         | 0.53        | 0.76        | 0.45        | 0.58       | 0.09 | 0.0395  |
| Parvalbumin 3                                              | <i>pvalb3</i>             | IPI00492274 | 6        | 2               | 7.35E-18  | 0.54        | NQ          | 0.60        | 0.57       | 0.03 | 0.0261  |
| Novel protein similar to H.sapiens TTN, titin (TTN)        | <i>CH211-198B21.1-001</i> | IPI00851394 | 66       | 4               | 0         | 0.58        | 0.53        | 0.59        | 0.56       | 0.02 | 0.0006  |
| Myomesin 2                                                 | <i>myom 2</i>             | IPI00960438 | 3        | 3               | 1.65E-18  | 0.63        | 0.57        | 0.38        | 0.56       | 0.07 | 0.0204  |
| Myosin, heavy chain 7B, cardiac muscle, beta               | <i>myh7b</i>              | IPI00501288 | 22       | 2               | 1.22E-233 | 0.56        | 0.57        | 0.51        | 0.55       | 0.02 | 0.0005  |
| Myosin, heavy polypeptide 2, fast muscle specific          | <i>myhz2</i>              | IPI00933204 | 151      | 6               | 0         | 0.48        | 0.54        | 0.29        | 0.44       | 0.08 | 0.0150  |
| Embryonic globin beta 3                                    | <i>hbbe3</i>              | IPI00496135 | 9        | 9               | 1.88E-171 | 0.35        | 0.26        | 0.31        | 0.31       | 0.02 | 0.0004  |
| Embryonic globin alpha 3                                   | <i>hbae3</i>              | IPI00492692 | 4        | 3               | 3.44E-36  | 0.31        | 0.23        | 0.37        | 0.30       | 0.04 | 0.0023  |
| Embryonic globin beta 1                                    | <i>hbbe1</i>              | IPI00502256 | 9        | 9               | 1.90E-101 | 0.30        | 0.20        | 0.34        | 0.28       | 0.04 | 0.0024  |
| TAR DNA binding protein, like                              | <i>tardbpl</i>            | IPI00504192 | 7        | 5               | 6.23E-78  | 0.20        | 0.12        | 0.11        | 0.16       | 0.03 | 0.0007  |

Hits from the quantitative proteomic analysis of the *tardbp*<sup>-/-</sup>; *tardbp1*<sup>-/-</sup> mutants grouped into down-regulated proteins. Inclusion criteria for a hit were: at least 30% increased or decreased abundance, successful quantification in at least two biological replicates, at least two unique peptides identified and a *P* value < 0.05 (Student *t* test). Protein name, gene name, IPI accession number, the number of identified unique peptides, the posterior error probability (PEP), the ratio of the protein abundance in the three different biological replicates (Ratio Ex. 1–3), the resulting mean ratio, the SEM ratio (SEM), and the calculated *P* value are given. Protein ratios, which could not be determined in a respective biological replicate, are marked as not quantifiable (NQ). The low amounts of the hemoglobin proteins in the mutants are presumably a preparation artifact, because blood cells accumulate on the yolk in the mutants specifically and most likely are manually removed during the de yolking step for sample preparation.

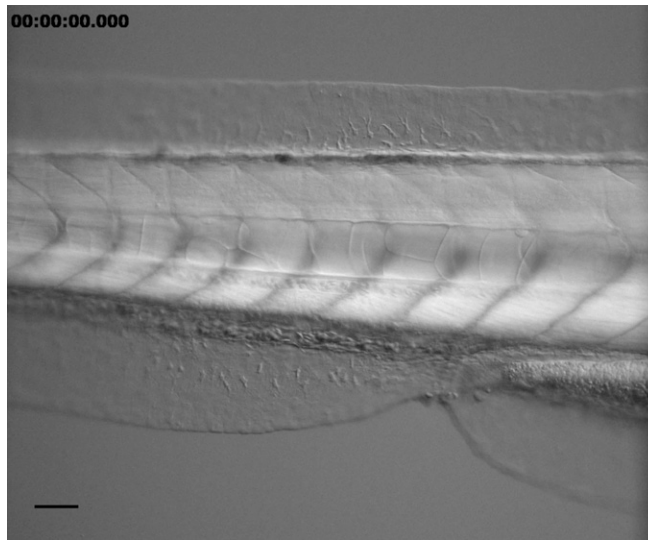

**Movie S1.** The movie shows a wild-type embryo with normal circulation of erythrocytes (2 dpf, lateral view of the trunk, anterior to the right). (Scale bar: 50  $\mu\text{m}$ .)

[Movie S1](#)

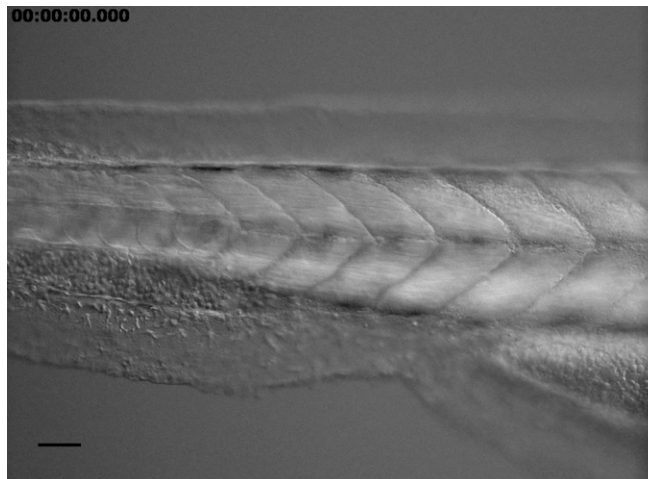

**Movie S2.** The movie shows the lack of circulating erythrocytes in *tardbp*<sup>-/-</sup>; *tardbp1*<sup>-/-</sup> embryos (2 dpf, lateral view of the trunk, anterior to the right). (Scale bar: 50  $\mu\text{m}$ .)

[Movie S2](#)

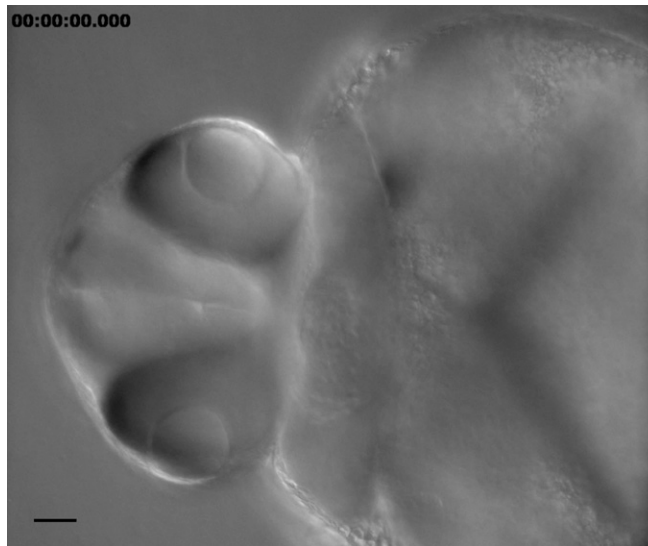

**Movie S3.** The movie shows the beating heart of a wild-type embryo (2 dpf, ventral view on the heart, anterior to the left). (Scale bar: 50  $\mu\text{m}$ .)

[Movie S3](#)

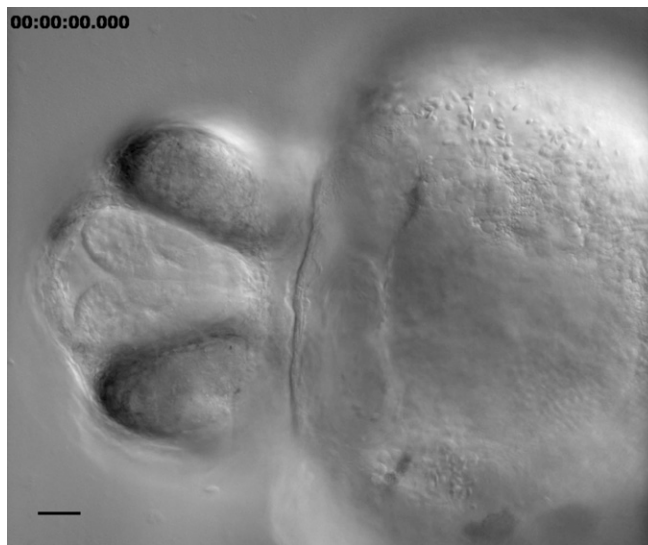

**Movie S4.** The movie shows a beating heart in *tardbp*<sup>-/-</sup>;*tardbpl*<sup>-/-</sup> embryos (2 dpf, ventral view on the heart, anterior to the left). (Scale bar: 50  $\mu\text{m}$ .)

[Movie S4](#)



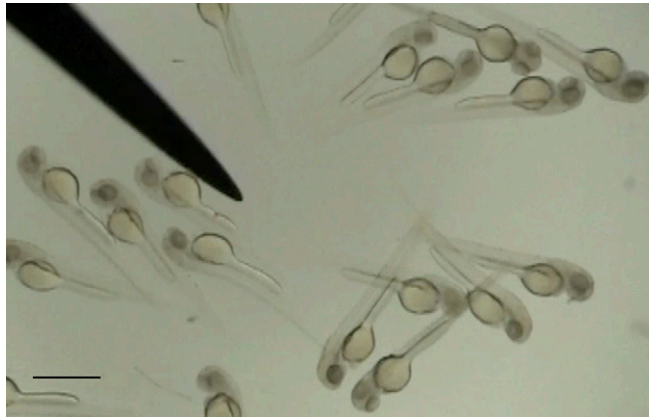

**Movie S5.** *tardbp*<sup>-/-</sup>;*tardbpl*<sup>-/-</sup> embryos have a movement phenotype. Video recordings of the escape response of wild-type and *tardbp*<sup>-/-</sup>;*tardbpl*<sup>-/-</sup> embryos at 2 dpf upon touch stimulus. (Scale bar: 1 mm.)

[Movie S5](#)
